# Supplementary material for: Adverse events associated with poor neurological outcome during targeted temperature management and advanced critical care after out-of-hospital cardiac arrest
Source: PubMed Central journal article supplement (PMC4511983; doi:10.1186/s13054-015-0991-9), 2015-07-22
Supplement: 13054_2015_991_MOESM1_ESM.pdf [file 13054_2015_991_MOESM1_ESM.pdf]

**Additional file 1. Korean Hypothermia Network (KORHN) Registry Case Report Form**

Recorder: \_\_\_\_\_ Date of arrest: \_\_\_\_\_/\_\_\_\_\_/\_\_\_\_\_

|                                     |                                                                                                                                                                                                                                                                                                                                                                                                                                                                                                             |                                                                                                                                                                                                                                                                                                                                                                                                                                                                                                                                                                                                                                                                                     |                                                                                                                                                                                                                                                                                                                                                                                                                                                                                                                                 |                                                             |                                                          |                                                          |
|-------------------------------------|-------------------------------------------------------------------------------------------------------------------------------------------------------------------------------------------------------------------------------------------------------------------------------------------------------------------------------------------------------------------------------------------------------------------------------------------------------------------------------------------------------------|-------------------------------------------------------------------------------------------------------------------------------------------------------------------------------------------------------------------------------------------------------------------------------------------------------------------------------------------------------------------------------------------------------------------------------------------------------------------------------------------------------------------------------------------------------------------------------------------------------------------------------------------------------------------------------------|---------------------------------------------------------------------------------------------------------------------------------------------------------------------------------------------------------------------------------------------------------------------------------------------------------------------------------------------------------------------------------------------------------------------------------------------------------------------------------------------------------------------------------|-------------------------------------------------------------|----------------------------------------------------------|----------------------------------------------------------|
| Hospital Code                       |                                                                                                                                                                                                                                                                                                                                                                                                                                                                                                             |                                                                                                                                                                                                                                                                                                                                                                                                                                                                                                                                                                                                                                                                                     | Type of ED Visit                                                                                                                                                                                                                                                                                                                                                                                                                                                                                                                | Direct visit <input type="checkbox"/>                       | Transferred <input type="checkbox"/>                     |                                                          |
| Initial of Name                     | Age                                                                                                                                                                                                                                                                                                                                                                                                                                                                                                         | yyyy-mm-dd                                                                                                                                                                                                                                                                                                                                                                                                                                                                                                                                                                                                                                                                          | Sex                                                                                                                                                                                                                                                                                                                                                                                                                                                                                                                             | male <input type="checkbox"/>                               | female <input type="checkbox"/>                          |                                                          |
| Premorbid status                    | Previous healthy <input type="checkbox"/> previous cardiac arrest <input type="checkbox"/> myocardial infarction <input type="checkbox"/> angina pectoris <input type="checkbox"/> CHF (NYHA) <input type="checkbox"/> HTN <input type="checkbox"/> DM <input type="checkbox"/> pulmonary disease <input type="checkbox"/> stroke <input type="checkbox"/> neurological disease <input type="checkbox"/> renal dz. <input type="checkbox"/> LC <input type="checkbox"/> malignancy <input type="checkbox"/> |                                                                                                                                                                                                                                                                                                                                                                                                                                                                                                                                                                                                                                                                                     |                                                                                                                                                                                                                                                                                                                                                                                                                                                                                                                                 |                                                             |                                                          |                                                          |
| <b>Resuscitation variables</b>      |                                                                                                                                                                                                                                                                                                                                                                                                                                                                                                             |                                                                                                                                                                                                                                                                                                                                                                                                                                                                                                                                                                                                                                                                                     |                                                                                                                                                                                                                                                                                                                                                                                                                                                                                                                                 |                                                             |                                                          |                                                          |
| Pre-EMS                             | Witness                                                                                                                                                                                                                                                                                                                                                                                                                                                                                                     | yes <input type="checkbox"/> no <input type="checkbox"/>                                                                                                                                                                                                                                                                                                                                                                                                                                                                                                                                                                                                                            | Bystander CPR                                                                                                                                                                                                                                                                                                                                                                                                                                                                                                                   | yes <input type="checkbox"/> no <input type="checkbox"/>    |                                                          |                                                          |
| EMS                                 | Initial rhythm                                                                                                                                                                                                                                                                                                                                                                                                                                                                                              | VF/VT <input type="checkbox"/> PEA <input type="checkbox"/> asystole <input type="checkbox"/>                                                                                                                                                                                                                                                                                                                                                                                                                                                                                                                                                                                       |                                                                                                                                                                                                                                                                                                                                                                                                                                                                                                                                 |                                                             | Chest compression                                        | yes <input type="checkbox"/> no <input type="checkbox"/> |
|                                     | Unknown shockable <input type="checkbox"/> Unknown non-shockable <input type="checkbox"/> Unknown <input type="checkbox"/>                                                                                                                                                                                                                                                                                                                                                                                  |                                                                                                                                                                                                                                                                                                                                                                                                                                                                                                                                                                                                                                                                                     |                                                                                                                                                                                                                                                                                                                                                                                                                                                                                                                                 |                                                             |                                                          |                                                          |
| ED                                  | Airway                                                                                                                                                                                                                                                                                                                                                                                                                                                                                                      | No device <input type="checkbox"/> BVM <input type="checkbox"/> Advanced airway <input type="checkbox"/>                                                                                                                                                                                                                                                                                                                                                                                                                                                                                                                                                                            |                                                                                                                                                                                                                                                                                                                                                                                                                                                                                                                                 |                                                             | AED                                                      | yes <input type="checkbox"/> no <input type="checkbox"/> |
|                                     | Initial rhythm                                                                                                                                                                                                                                                                                                                                                                                                                                                                                              | VF/VT <input type="checkbox"/> PEA <input type="checkbox"/> asystole <input type="checkbox"/>                                                                                                                                                                                                                                                                                                                                                                                                                                                                                                                                                                                       |                                                                                                                                                                                                                                                                                                                                                                                                                                                                                                                                 |                                                             | Number of shocks ( )                                     | Epinephrine ___mg                                        |
| Time factor                         | Witnessed (yyyy-mm-dd-hh-mm), Encountered (if not witnessed) (yyyy-mm-dd-hh-mm), ROSC (yyyy-mm-dd-hh-mm)                                                                                                                                                                                                                                                                                                                                                                                                    |                                                                                                                                                                                                                                                                                                                                                                                                                                                                                                                                                                                                                                                                                     |                                                                                                                                                                                                                                                                                                                                                                                                                                                                                                                                 |                                                             |                                                          |                                                          |
| Cause of arrest                     | Cardiac <input type="checkbox"/> submersion <input type="checkbox"/> drug overdose or side effects <input type="checkbox"/> asphyxia <input type="checkbox"/> exsanguination <input type="checkbox"/> hanging <input type="checkbox"/> other non-cardiac <input type="checkbox"/>                                                                                                                                                                                                                           |                                                                                                                                                                                                                                                                                                                                                                                                                                                                                                                                                                                                                                                                                     |                                                                                                                                                                                                                                                                                                                                                                                                                                                                                                                                 |                                                             |                                                          |                                                          |
| <b>Post-resuscitation variables</b> |                                                                                                                                                                                                                                                                                                                                                                                                                                                                                                             |                                                                                                                                                                                                                                                                                                                                                                                                                                                                                                                                                                                                                                                                                     |                                                                                                                                                                                                                                                                                                                                                                                                                                                                                                                                 |                                                             |                                                          |                                                          |
| Breathing                           | Spontaneous breathing after ROSC yes <input type="checkbox"/> no <input type="checkbox"/> 24hr yes <input type="checkbox"/> no <input type="checkbox"/> 48hr yes <input type="checkbox"/> no <input type="checkbox"/> 72hr yes <input type="checkbox"/> no <input type="checkbox"/>                                                                                                                                                                                                                         |                                                                                                                                                                                                                                                                                                                                                                                                                                                                                                                                                                                                                                                                                     |                                                                                                                                                                                                                                                                                                                                                                                                                                                                                                                                 |                                                             |                                                          |                                                          |
|                                     | Chest X-ray (0-1h)                                                                                                                                                                                                                                                                                                                                                                                                                                                                                          | Pneumothorax yes <input type="checkbox"/> no <input type="checkbox"/> Hemothorax yes <input type="checkbox"/> no <input type="checkbox"/> Pulmonary edema yes <input type="checkbox"/> no <input type="checkbox"/><br>Pulmonary contusion yes <input type="checkbox"/> no <input type="checkbox"/> Evidence of aspiration (0-1h) yes <input type="checkbox"/> no <input type="checkbox"/>                                                                                                                                                                                                                                                                                           |                                                                                                                                                                                                                                                                                                                                                                                                                                                                                                                                 |                                                             |                                                          |                                                          |
| Circulation                         | Rate 0-1h ( / ) 1-24h ( / ) 24-48h ( / ) 48-72h ( / )                                                                                                                                                                                                                                                                                                                                                                                                                                                       |                                                                                                                                                                                                                                                                                                                                                                                                                                                                                                                                                                                                                                                                                     |                                                                                                                                                                                                                                                                                                                                                                                                                                                                                                                                 |                                                             |                                                          |                                                          |
|                                     | Lactate (0-1h) ( )                                                                                                                                                                                                                                                                                                                                                                                                                                                                                          |                                                                                                                                                                                                                                                                                                                                                                                                                                                                                                                                                                                                                                                                                     |                                                                                                                                                                                                                                                                                                                                                                                                                                                                                                                                 |                                                             |                                                          |                                                          |
|                                     | STEMI yes <input type="checkbox"/> no <input type="checkbox"/> Clinical evidence of cardiogenic shock yes <input type="checkbox"/> no <input type="checkbox"/>                                                                                                                                                                                                                                                                                                                                              |                                                                                                                                                                                                                                                                                                                                                                                                                                                                                                                                                                                                                                                                                     |                                                                                                                                                                                                                                                                                                                                                                                                                                                                                                                                 |                                                             |                                                          |                                                          |
|                                     | ECMO/IABP/CRRT yes <input type="checkbox"/> no <input type="checkbox"/> If yes, record the time (yyyy-mm-dd-hh-mm)                                                                                                                                                                                                                                                                                                                                                                                          |                                                                                                                                                                                                                                                                                                                                                                                                                                                                                                                                                                                                                                                                                     |                                                                                                                                                                                                                                                                                                                                                                                                                                                                                                                                 |                                                             |                                                          |                                                          |
|                                     | ICD/Pacemaker yes <input type="checkbox"/> no <input type="checkbox"/> If yes, record the time (yyyy-mm-dd-hh-mm)                                                                                                                                                                                                                                                                                                                                                                                           |                                                                                                                                                                                                                                                                                                                                                                                                                                                                                                                                                                                                                                                                                     |                                                                                                                                                                                                                                                                                                                                                                                                                                                                                                                                 |                                                             |                                                          |                                                          |
|                                     | Holter/EP yes <input type="checkbox"/> no <input type="checkbox"/> If yes, record the time (yyyy-mm-dd-hh-mm)                                                                                                                                                                                                                                                                                                                                                                                               |                                                                                                                                                                                                                                                                                                                                                                                                                                                                                                                                                                                                                                                                                     |                                                                                                                                                                                                                                                                                                                                                                                                                                                                                                                                 |                                                             |                                                          |                                                          |
|                                     | Thrombolysis/Angiography/PCI/CABG/Anticoagulant/Antiplatelet yes <input type="checkbox"/> no <input type="checkbox"/> If yes, record the time (yyyy-mm-dd-hh-mm)                                                                                                                                                                                                                                                                                                                                            |                                                                                                                                                                                                                                                                                                                                                                                                                                                                                                                                                                                                                                                                                     |                                                                                                                                                                                                                                                                                                                                                                                                                                                                                                                                 |                                                             |                                                          |                                                          |
| Neurological                        | After ROSC or arrival                                                                                                                                                                                                                                                                                                                                                                                                                                                                                       | GCS (E V M)                                                                                                                                                                                                                                                                                                                                                                                                                                                                                                                                                                                                                                                                         | Pupillary light reflexes                                                                                                                                                                                                                                                                                                                                                                                                                                                                                                        | yes <input type="checkbox"/> no <input type="checkbox"/>    | Corneal reflex                                           | yes <input type="checkbox"/> no <input type="checkbox"/> |
|                                     | Involuntary movement                                                                                                                                                                                                                                                                                                                                                                                                                                                                                        | Seizure                                                                                                                                                                                                                                                                                                                                                                                                                                                                                                                                                                                                                                                                             | yes <input type="checkbox"/> no <input type="checkbox"/>                                                                                                                                                                                                                                                                                                                                                                                                                                                                        | Myoclonus                                                   | yes <input type="checkbox"/> no <input type="checkbox"/> |                                                          |
|                                     | EEG                                                                                                                                                                                                                                                                                                                                                                                                                                                                                                         | yes <input type="checkbox"/> no <input type="checkbox"/> If yes, record the time (yyyy-mm-dd-hh-mm) and findings ( )                                                                                                                                                                                                                                                                                                                                                                                                                                                                                                                                                                |                                                                                                                                                                                                                                                                                                                                                                                                                                                                                                                                 |                                                             |                                                          |                                                          |
|                                     | SSEP N20 peak                                                                                                                                                                                                                                                                                                                                                                                                                                                                                               | yes <input type="checkbox"/> no <input type="checkbox"/> If yes, record the time (yyyy-mm-dd-hh-mm)<br>bilateral absent <input type="checkbox"/> unilateral absent <input type="checkbox"/> bilateral present <input type="checkbox"/>                                                                                                                                                                                                                                                                                                                                                                                                                                              |                                                                                                                                                                                                                                                                                                                                                                                                                                                                                                                                 |                                                             |                                                          |                                                          |
|                                     | Brain imaging                                                                                                                                                                                                                                                                                                                                                                                                                                                                                               | Brain CT yes <input type="checkbox"/> no <input type="checkbox"/> date and time (yyyy-mm-dd-hh-mm)                                                                                                                                                                                                                                                                                                                                                                                                                                                                                                                                                                                  |                                                                                                                                                                                                                                                                                                                                                                                                                                                                                                                                 |                                                             |                                                          |                                                          |
|                                     |                                                                                                                                                                                                                                                                                                                                                                                                                                                                                                             | MRI yes <input type="checkbox"/> no <input type="checkbox"/> type ( ) date and time (yyyy-mm-dd-hh-mm)                                                                                                                                                                                                                                                                                                                                                                                                                                                                                                                                                                              |                                                                                                                                                                                                                                                                                                                                                                                                                                                                                                                                 |                                                             |                                                          |                                                          |
|                                     |                                                                                                                                                                                                                                                                                                                                                                                                                                                                                                             | Other study ( ) date and time (yyyy-mm-dd-hh-mm)                                                                                                                                                                                                                                                                                                                                                                                                                                                                                                                                                                                                                                    |                                                                                                                                                                                                                                                                                                                                                                                                                                                                                                                                 |                                                             |                                                          |                                                          |
|                                     | Anticonvulsants                                                                                                                                                                                                                                                                                                                                                                                                                                                                                             | yes <input type="checkbox"/> no <input type="checkbox"/> type ( )                                                                                                                                                                                                                                                                                                                                                                                                                                                                                                                                                                                                                   |                                                                                                                                                                                                                                                                                                                                                                                                                                                                                                                                 |                                                             |                                                          |                                                          |
|                                     | Analgesia                                                                                                                                                                                                                                                                                                                                                                                                                                                                                                   | yes <input type="checkbox"/> no <input type="checkbox"/> duration ( )                                                                                                                                                                                                                                                                                                                                                                                                                                                                                                                                                                                                               |                                                                                                                                                                                                                                                                                                                                                                                                                                                                                                                                 |                                                             |                                                          |                                                          |
| Sedation                            | yes <input type="checkbox"/> no <input type="checkbox"/> duration ( )                                                                                                                                                                                                                                                                                                                                                                                                                                       |                                                                                                                                                                                                                                                                                                                                                                                                                                                                                                                                                                                                                                                                                     |                                                                                                                                                                                                                                                                                                                                                                                                                                                                                                                                 |                                                             |                                                          |                                                          |
| Paralysis                           | yes <input type="checkbox"/> no <input type="checkbox"/> duration ( )                                                                                                                                                                                                                                                                                                                                                                                                                                       |                                                                                                                                                                                                                                                                                                                                                                                                                                                                                                                                                                                                                                                                                     |                                                                                                                                                                                                                                                                                                                                                                                                                                                                                                                                 |                                                             |                                                          |                                                          |
| Metabolic                           | Glucose (0-1h) ( ) Insulin treatment yes <input type="checkbox"/> no <input type="checkbox"/> Hypoglycemia (<72hrs, <80mg/dl) yes <input type="checkbox"/> no <input type="checkbox"/>                                                                                                                                                                                                                                                                                                                      |                                                                                                                                                                                                                                                                                                                                                                                                                                                                                                                                                                                                                                                                                     |                                                                                                                                                                                                                                                                                                                                                                                                                                                                                                                                 |                                                             |                                                          |                                                          |
|                                     | Attempted enteral feeding yes <input type="checkbox"/> no <input type="checkbox"/> Attempted parenteral feeding yes <input type="checkbox"/> no <input type="checkbox"/> If yes, time (yyyy-mm-dd-hh-mm)                                                                                                                                                                                                                                                                                                    |                                                                                                                                                                                                                                                                                                                                                                                                                                                                                                                                                                                                                                                                                     |                                                                                                                                                                                                                                                                                                                                                                                                                                                                                                                                 |                                                             |                                                          |                                                          |
| Therapeutic hypothermia             | Target temperature ( °C)                                                                                                                                                                                                                                                                                                                                                                                                                                                                                    |                                                                                                                                                                                                                                                                                                                                                                                                                                                                                                                                                                                                                                                                                     |                                                                                                                                                                                                                                                                                                                                                                                                                                                                                                                                 |                                                             |                                                          |                                                          |
|                                     | Induction start (yyyy-mm-dd-hh-mm) Maintenance start (yyyy-mm-dd-hh-mm) Rewarming start (yyyy-mm-dd-hh-mm)                                                                                                                                                                                                                                                                                                                                                                                                  |                                                                                                                                                                                                                                                                                                                                                                                                                                                                                                                                                                                                                                                                                     |                                                                                                                                                                                                                                                                                                                                                                                                                                                                                                                                 |                                                             |                                                          |                                                          |
|                                     | Induction technique                                                                                                                                                                                                                                                                                                                                                                                                                                                                                         | Cooling blanket or mattress <input type="checkbox"/> Ice bag <input type="checkbox"/> Cold saline or lactate Ringer <input type="checkbox"/> Endovascular catheter <input type="checkbox"/> Cold lavage or irrigation <input type="checkbox"/> Linen <input type="checkbox"/> Fan <input type="checkbox"/> Hydrogel pad <input type="checkbox"/> Cooling garment <input type="checkbox"/> Extracorporeal circulation <input type="checkbox"/> Others ( )                                                                                                                                                                                                                            |                                                                                                                                                                                                                                                                                                                                                                                                                                                                                                                                 |                                                             |                                                          |                                                          |
|                                     | Maintenance technique                                                                                                                                                                                                                                                                                                                                                                                                                                                                                       | Cooling blanket or mattress <input type="checkbox"/> Ice bag <input type="checkbox"/> Cold saline or lactate Ringer <input type="checkbox"/> Endovascular catheter <input type="checkbox"/> Cold lavage or irrigation <input type="checkbox"/> Linen <input type="checkbox"/> Fan <input type="checkbox"/> Hydrogel pad <input type="checkbox"/> Cooling garment <input type="checkbox"/> Extracorporeal circulation <input type="checkbox"/> Others ( )                                                                                                                                                                                                                            |                                                                                                                                                                                                                                                                                                                                                                                                                                                                                                                                 |                                                             |                                                          |                                                          |
|                                     | Rewarming technique                                                                                                                                                                                                                                                                                                                                                                                                                                                                                         | Cooling blanket or mattress <input type="checkbox"/> Ice bag <input type="checkbox"/> Cold saline or lactate Ringer <input type="checkbox"/> Endovascular catheter <input type="checkbox"/> Cold lavage or irrigation <input type="checkbox"/> Linen <input type="checkbox"/> Fan <input type="checkbox"/> Hydrogel pad <input type="checkbox"/> Cooling garment <input type="checkbox"/> Extracorporeal circulation <input type="checkbox"/> Others ( )                                                                                                                                                                                                                            |                                                                                                                                                                                                                                                                                                                                                                                                                                                                                                                                 |                                                             |                                                          |                                                          |
|                                     | Temperature monitoring site                                                                                                                                                                                                                                                                                                                                                                                                                                                                                 | Rectum <input type="checkbox"/> Tympanic <input type="checkbox"/> Esophagus <input type="checkbox"/> Bladder <input type="checkbox"/> Pulmonary artery <input type="checkbox"/> Brain <input type="checkbox"/> Others ( )                                                                                                                                                                                                                                                                                                                                                                                                                                                           |                                                                                                                                                                                                                                                                                                                                                                                                                                                                                                                                 |                                                             |                                                          |                                                          |
|                                     | Reasons to stop cooling                                                                                                                                                                                                                                                                                                                                                                                                                                                                                     | Refractory shock yes <input type="checkbox"/> no <input type="checkbox"/> Severe arrhythmia yes <input type="checkbox"/> no <input type="checkbox"/> Severe bleeding yes <input type="checkbox"/> no <input type="checkbox"/> DNAR yes <input type="checkbox"/> no <input type="checkbox"/> Others ( )                                                                                                                                                                                                                                                                                                                                                                              |                                                                                                                                                                                                                                                                                                                                                                                                                                                                                                                                 |                                                             |                                                          |                                                          |
| Adverse Events                      | Cooling-related                                                                                                                                                                                                                                                                                                                                                                                                                                                                                             | Overcooling yes <input type="checkbox"/> no <input type="checkbox"/> Bradycardia yes <input type="checkbox"/> no <input type="checkbox"/> If yes, need to treatment yes <input type="checkbox"/> no <input type="checkbox"/><br>Tachyarrhythmia yes <input type="checkbox"/> no <input type="checkbox"/> Hypokalemia yes <input type="checkbox"/> no <input type="checkbox"/> Hyperglycemia yes <input type="checkbox"/> no <input type="checkbox"/><br>Bleeding yes <input type="checkbox"/> no <input type="checkbox"/> If yes, need to transfusion yes <input type="checkbox"/> no <input type="checkbox"/> Hypotension yes <input type="checkbox"/> no <input type="checkbox"/> |                                                                                                                                                                                                                                                                                                                                                                                                                                                                                                                                 |                                                             |                                                          |                                                          |
|                                     |                                                                                                                                                                                                                                                                                                                                                                                                                                                                                                             | Rewarming-related                                                                                                                                                                                                                                                                                                                                                                                                                                                                                                                                                                                                                                                                   | Rebound hyperthermia yes <input type="checkbox"/> no <input type="checkbox"/> Arrhythmia yes <input type="checkbox"/> no <input type="checkbox"/> Hyperkalemia yes <input type="checkbox"/> no <input type="checkbox"/><br>Hypoglycemia yes <input type="checkbox"/> no <input type="checkbox"/> Bleeding yes <input type="checkbox"/> no <input type="checkbox"/> If yes, need to transfusion yes <input type="checkbox"/> no <input type="checkbox"/><br>Hypotension yes <input type="checkbox"/> no <input type="checkbox"/> |                                                             |                                                          |                                                          |
|                                     | Other adverse events                                                                                                                                                                                                                                                                                                                                                                                                                                                                                        |                                                                                                                                                                                                                                                                                                                                                                                                                                                                                                                                                                                                                                                                                     | Sepsis yes <input type="checkbox"/> no <input type="checkbox"/> (severe sepsis yes <input type="checkbox"/> no <input type="checkbox"/> , septic shock yes <input type="checkbox"/> no <input type="checkbox"/> )<br>Pneumonia yes <input type="checkbox"/> no <input type="checkbox"/>                                                                                                                                                                                                                                         |                                                             |                                                          |                                                          |
|                                     |                                                                                                                                                                                                                                                                                                                                                                                                                                                                                                             |                                                                                                                                                                                                                                                                                                                                                                                                                                                                                                                                                                                                                                                                                     |                                                                                                                                                                                                                                                                                                                                                                                                                                                                                                                                 |                                                             |                                                          |                                                          |
| <b>Outcome variables</b>            |                                                                                                                                                                                                                                                                                                                                                                                                                                                                                                             |                                                                                                                                                                                                                                                                                                                                                                                                                                                                                                                                                                                                                                                                                     |                                                                                                                                                                                                                                                                                                                                                                                                                                                                                                                                 |                                                             |                                                          |                                                          |
| ICU admission                       | yes <input type="checkbox"/> no <input type="checkbox"/>                                                                                                                                                                                                                                                                                                                                                                                                                                                    |                                                                                                                                                                                                                                                                                                                                                                                                                                                                                                                                                                                                                                                                                     | Survival discharge                                                                                                                                                                                                                                                                                                                                                                                                                                                                                                              | yes <input type="checkbox"/> no <input type="checkbox"/>    |                                                          |                                                          |
| Cause of death                      | Hypoxic brain injury <input type="checkbox"/> Multiple organ failure <input type="checkbox"/> Sepsis <input type="checkbox"/> Others ( )                                                                                                                                                                                                                                                                                                                                                                    |                                                                                                                                                                                                                                                                                                                                                                                                                                                                                                                                                                                                                                                                                     |                                                                                                                                                                                                                                                                                                                                                                                                                                                                                                                                 | CPC at hospital discharge ( )<br>Hospital death date (HD# ) |                                                          |                                                          |
