# Supplementary material for: Adverse events associated with poor neurological outcome during targeted temperature management and advanced critical care after out-of-hospital cardiac arrest
Source: PubMed Central journal article supplement (PMC4511983; doi:10.1186/s13054-015-0991-9), 2015-07-22
Supplement: 13054_2015_991_MOESM2_ESM.pdf [file 13054_2015_991_MOESM2_ESM.pdf]

**Additional file 2. Korean Hypothermia Network (KORHN) Registry Investigator Manual**

| <b>Data field</b>                      | <b>Definition</b>                                                                                                                                                                                                                                                                                                                                                                                                                                                                               |      |                                                         |      |                                                        |      |                                                                  |      |                                        |
|----------------------------------------|-------------------------------------------------------------------------------------------------------------------------------------------------------------------------------------------------------------------------------------------------------------------------------------------------------------------------------------------------------------------------------------------------------------------------------------------------------------------------------------------------|------|---------------------------------------------------------|------|--------------------------------------------------------|------|------------------------------------------------------------------|------|----------------------------------------|
| <b>Patient enrolment information</b>   |                                                                                                                                                                                                                                                                                                                                                                                                                                                                                                 |      |                                                         |      |                                                        |      |                                                                  |      |                                        |
| Recorder                               | Record the name of investigator who registered the patient data                                                                                                                                                                                                                                                                                                                                                                                                                                 |      |                                                         |      |                                                        |      |                                                                  |      |                                        |
| Date of arrest                         | Record the date of arrest in yyyy-mm-dd format                                                                                                                                                                                                                                                                                                                                                                                                                                                  |      |                                                         |      |                                                        |      |                                                                  |      |                                        |
| Hospital code                          | Three letters of alphabetical codes are predefined hospital codes for each hospital and following 4 serial numbers are automatically generated in the system                                                                                                                                                                                                                                                                                                                                    |      |                                                         |      |                                                        |      |                                                                  |      |                                        |
| <b>Patient demographics</b>            |                                                                                                                                                                                                                                                                                                                                                                                                                                                                                                 |      |                                                         |      |                                                        |      |                                                                  |      |                                        |
| Type of ED Visit                       | Direct visit or Transferred                                                                                                                                                                                                                                                                                                                                                                                                                                                                     |      |                                                         |      |                                                        |      |                                                                  |      |                                        |
| Initial of Name                        | English initial of the patients' name                                                                                                                                                                                                                                                                                                                                                                                                                                                           |      |                                                         |      |                                                        |      |                                                                  |      |                                        |
| Age                                    | Record the birthday in yyyy-mm-dd format                                                                                                                                                                                                                                                                                                                                                                                                                                                        |      |                                                         |      |                                                        |      |                                                                  |      |                                        |
| Sex                                    | Select male or female.                                                                                                                                                                                                                                                                                                                                                                                                                                                                          |      |                                                         |      |                                                        |      |                                                                  |      |                                        |
| Best CPC before arrest                 | Select the cerebral performance category (CPC) score <table border="1" style="width: 100%; border-collapse: collapse;"> <tr> <td>CPC1</td> <td>Good cerebral performance, able to work and normal life</td> </tr> <tr> <td>CPC2</td> <td>Moderate cerebral disability, disabled but independent</td> </tr> <tr> <td>CPC3</td> <td>Severe cerebral disability, conscious but disabled and dependent</td> </tr> <tr> <td>CPC4</td> <td>Coma/vegetative state, unconsciousness</td> </tr> </table> | CPC1 | Good cerebral performance, able to work and normal life | CPC2 | Moderate cerebral disability, disabled but independent | CPC3 | Severe cerebral disability, conscious but disabled and dependent | CPC4 | Coma/vegetative state, unconsciousness |
| CPC1                                   | Good cerebral performance, able to work and normal life                                                                                                                                                                                                                                                                                                                                                                                                                                         |      |                                                         |      |                                                        |      |                                                                  |      |                                        |
| CPC2                                   | Moderate cerebral disability, disabled but independent                                                                                                                                                                                                                                                                                                                                                                                                                                          |      |                                                         |      |                                                        |      |                                                                  |      |                                        |
| CPC3                                   | Severe cerebral disability, conscious but disabled and dependent                                                                                                                                                                                                                                                                                                                                                                                                                                |      |                                                         |      |                                                        |      |                                                                  |      |                                        |
| CPC4                                   | Coma/vegetative state, unconsciousness                                                                                                                                                                                                                                                                                                                                                                                                                                                          |      |                                                         |      |                                                        |      |                                                                  |      |                                        |
| Premorbid status                       | Multiple selections are allowed.<br>Previous healthy define absence of the listed diseases                                                                                                                                                                                                                                                                                                                                                                                                      |      |                                                         |      |                                                        |      |                                                                  |      |                                        |
| <b>Resuscitation variables</b>         |                                                                                                                                                                                                                                                                                                                                                                                                                                                                                                 |      |                                                         |      |                                                        |      |                                                                  |      |                                        |
| <b>1.Pre-EMS</b>                       |                                                                                                                                                                                                                                                                                                                                                                                                                                                                                                 |      |                                                         |      |                                                        |      |                                                                  |      |                                        |
| Witnessed                              | A cardiac arrest that is seen or heard by another person or is monitored                                                                                                                                                                                                                                                                                                                                                                                                                        |      |                                                         |      |                                                        |      |                                                                  |      |                                        |
| Bystander CPR                          | Cardiopulmonary resuscitation performed by a person who is not responding as part of an organized emergency response system to a cardiac arrest                                                                                                                                                                                                                                                                                                                                                 |      |                                                         |      |                                                        |      |                                                                  |      |                                        |
| <b>2.EMS</b>                           |                                                                                                                                                                                                                                                                                                                                                                                                                                                                                                 |      |                                                         |      |                                                        |      |                                                                  |      |                                        |
| Initial rhythm                         | Select the one monitored rhythm.<br>Unknown shockable - shock on AED which is not monitored the rhythm<br>Unknown unshockable - no shock on AED which is not monitored the rhythm<br>Unknown - no information is available                                                                                                                                                                                                                                                                      |      |                                                         |      |                                                        |      |                                                                  |      |                                        |
| Chest compression                      | Select yes or no                                                                                                                                                                                                                                                                                                                                                                                                                                                                                |      |                                                         |      |                                                        |      |                                                                  |      |                                        |
| Airway                                 | Select one method. Advanced airway was defined endotracheal intubation or supraglottic devices                                                                                                                                                                                                                                                                                                                                                                                                  |      |                                                         |      |                                                        |      |                                                                  |      |                                        |
| AED                                    | Any AED apply with/without shock                                                                                                                                                                                                                                                                                                                                                                                                                                                                |      |                                                         |      |                                                        |      |                                                                  |      |                                        |
| Number of shocks                       | Number of shock performed by EMT                                                                                                                                                                                                                                                                                                                                                                                                                                                                |      |                                                         |      |                                                        |      |                                                                  |      |                                        |
| <b>3.Emergency department</b>          |                                                                                                                                                                                                                                                                                                                                                                                                                                                                                                 |      |                                                         |      |                                                        |      |                                                                  |      |                                        |
| Initial rhythm                         | Select the one monitored rhythm                                                                                                                                                                                                                                                                                                                                                                                                                                                                 |      |                                                         |      |                                                        |      |                                                                  |      |                                        |
| Number of shocks                       | Number of shock performed by ED personnel                                                                                                                                                                                                                                                                                                                                                                                                                                                       |      |                                                         |      |                                                        |      |                                                                  |      |                                        |
| Epinephrine                            | Total dose                                                                                                                                                                                                                                                                                                                                                                                                                                                                                      |      |                                                         |      |                                                        |      |                                                                  |      |                                        |
| <b>4.Time factors</b>                  |                                                                                                                                                                                                                                                                                                                                                                                                                                                                                                 |      |                                                         |      |                                                        |      |                                                                  |      |                                        |
| Witnessed time                         | Record witnessed time in yyyy-mm-dd-hh-mm format                                                                                                                                                                                                                                                                                                                                                                                                                                                |      |                                                         |      |                                                        |      |                                                                  |      |                                        |
| Encountered time                       | If not witnessed, record encountered time in yyyy-mm-dd-hh-mm format                                                                                                                                                                                                                                                                                                                                                                                                                            |      |                                                         |      |                                                        |      |                                                                  |      |                                        |
| ROSC                                   | A palpable pulse or generating a blood pressure was sustained for >20 min (or return of circulation if extracorporeal circulatory support is applied).                                                                                                                                                                                                                                                                                                                                          |      |                                                         |      |                                                        |      |                                                                  |      |                                        |
| Cause of arrest                        | Select the one cause<br>Other non-cardiac includes anaphylaxis, excessive cold, excessive heat, hanging, lightning, electrocution, terminal illness, venomous sting, chemical poisoning, radiation exposure, etc.                                                                                                                                                                                                                                                                               |      |                                                         |      |                                                        |      |                                                                  |      |                                        |
| <b>Post-resuscitation variables</b>    |                                                                                                                                                                                                                                                                                                                                                                                                                                                                                                 |      |                                                         |      |                                                        |      |                                                                  |      |                                        |
| <b>1.Breathing</b>                     |                                                                                                                                                                                                                                                                                                                                                                                                                                                                                                 |      |                                                         |      |                                                        |      |                                                                  |      |                                        |
| Spontaneous breathing                  | Select yes if presence of spontaneous breathing at each time point                                                                                                                                                                                                                                                                                                                                                                                                                              |      |                                                         |      |                                                        |      |                                                                  |      |                                        |
| Chest X-ray (0-1 h)                    | Select yes if presence of each finding on chest X-ray checked within 1 hour after ROSC                                                                                                                                                                                                                                                                                                                                                                                                          |      |                                                         |      |                                                        |      |                                                                  |      |                                        |
| <b>2.Circulation</b>                   |                                                                                                                                                                                                                                                                                                                                                                                                                                                                                                 |      |                                                         |      |                                                        |      |                                                                  |      |                                        |
| Rate                                   | Record highest and lowest values at each time point                                                                                                                                                                                                                                                                                                                                                                                                                                             |      |                                                         |      |                                                        |      |                                                                  |      |                                        |
| Lactate (0-1 h)                        | Record the value within 1 hour after ROSC                                                                                                                                                                                                                                                                                                                                                                                                                                                       |      |                                                         |      |                                                        |      |                                                                  |      |                                        |
| Clinical evidence of cardiogenic shock | Hypotension (SBP <90 mmHg or MAP <60mmHg for at least 30 min or the need for supportive measures (fluid loading and vasopressors or inotropic or both) to maintain a SBP > 90 mmHg or MAP >60 mmHg) and end-organ hypoperfusion (cool extremities)                                                                                                                                                                                                                                              |      |                                                         |      |                                                        |      |                                                                  |      |                                        |
| Cardiac interventions                  | Select yes if the intervention was performed and record time in yyyy-mm-dd-hh-mm format                                                                                                                                                                                                                                                                                                                                                                                                         |      |                                                         |      |                                                        |      |                                                                  |      |                                        |
| <b>3.Neurological</b>                  |                                                                                                                                                                                                                                                                                                                                                                                                                                                                                                 |      |                                                         |      |                                                        |      |                                                                  |      |                                        |
| Glasgow coma scale                     | Record each value after ROSC or ED arrival in transferred case                                                                                                                                                                                                                                                                                                                                                                                                                                  |      |                                                         |      |                                                        |      |                                                                  |      |                                        |
| Pupillary light reflexes               | Select yes if presence after ROSC or ED arrival in transferred case                                                                                                                                                                                                                                                                                                                                                                                                                             |      |                                                         |      |                                                        |      |                                                                  |      |                                        |
| Corneal reflexes                       | Select yes if presence after ROSC or ED arrival in transferred case                                                                                                                                                                                                                                                                                                                                                                                                                             |      |                                                         |      |                                                        |      |                                                                  |      |                                        |
| Seizure                                | Involuntary movement or no movement with epileptiform discharge on EEG                                                                                                                                                                                                                                                                                                                                                                                                                          |      |                                                         |      |                                                        |      |                                                                  |      |                                        |

|                                   |                                                                                                                                                                                                                                                                                                                |
|-----------------------------------|----------------------------------------------------------------------------------------------------------------------------------------------------------------------------------------------------------------------------------------------------------------------------------------------------------------|
| Myoclonus                         | Involuntary movement without epileptiform discharge on EEG                                                                                                                                                                                                                                                     |
| EEG                               | Select yes if EEG was performed and record time in yyyy-mm-dd-hh-mm format                                                                                                                                                                                                                                     |
| SSEP N20 peak                     | Select yes if SSEP was performed and record findings and time in yyyy-mm-dd-hh-mm format                                                                                                                                                                                                                       |
| Brain imaging                     | Select yes if the imaging study was performed and record time in yyyy-mm-dd-hh-mm format                                                                                                                                                                                                                       |
| Anticonvulsants                   | Select yes if anticonvulsants were used and record names of the drugs                                                                                                                                                                                                                                          |
| Analgesia                         | Select yes if analgesic was used and record the duration                                                                                                                                                                                                                                                       |
| Sedation                          | Select yes if sedative was used and record the duration                                                                                                                                                                                                                                                        |
| Paralysis                         | Select yes if neuromuscular blocker was used and record the duration                                                                                                                                                                                                                                           |
| <b>4. Metabolic</b>               |                                                                                                                                                                                                                                                                                                                |
| Glucose (0-1h)                    | Record the highest value within 1 hour after ROSC                                                                                                                                                                                                                                                              |
| Insulin treatment                 | Select yes if insulin was used                                                                                                                                                                                                                                                                                 |
| Hypoglycemia                      | Select yes if any single event $\leq 80$ mg/dl which was developed within 72 h after ROSC                                                                                                                                                                                                                      |
| Attempted enteral feeding         | Select yes if enteral feeding was started within 72 h after ROSC and record time in yyyy-mm-dd-hh-mm format                                                                                                                                                                                                    |
| Attempted parenteral feeding      | Select yes if parenteral feeding was started within 72 h after ROSC and record time in yyyy-mm-dd-hh-mm format                                                                                                                                                                                                 |
| <b>5. Therapeutic hypothermia</b> |                                                                                                                                                                                                                                                                                                                |
| Target temperature                | Record target temperature level                                                                                                                                                                                                                                                                                |
| Induction start                   | Record the time of cooling start in yyyy-mm-dd-hh-mm format                                                                                                                                                                                                                                                    |
| Maintenance start                 | Record the time for reaching at 34°C in yyyy-mm-dd-hh-mm format                                                                                                                                                                                                                                                |
| Rewarming start                   | Record the time of rewarming start in yyyy-mm-dd-hh-mm format                                                                                                                                                                                                                                                  |
| Reach to normal temperature       | Record the time for reaching at 36.5°C after rewarming in yyyy-mm-dd-hh-mm format                                                                                                                                                                                                                              |
| TH techniques                     | Select all type of devices which were used for the cooling and rewarming                                                                                                                                                                                                                                       |
| Temperature monitoring site       | Select all site which were used for the temperature monitoring                                                                                                                                                                                                                                                 |
| Reasons to stop cooling           | Select the reason to stop cooling. If other reason was , describe the reason                                                                                                                                                                                                                                   |
| <b>6. Adverse events</b>          |                                                                                                                                                                                                                                                                                                                |
| Overcooling                       | Drop of body temperature below 32°C during induction and maintenance                                                                                                                                                                                                                                           |
| Rebound hyperthermia              | Increase of body temperature over 38°C during rewarming                                                                                                                                                                                                                                                        |
| Bradycardia                       | Heart rate lower than 40 per minute                                                                                                                                                                                                                                                                            |
| Tachyarrhythmia                   | Newly developed tachyarrhythmia except sinus tachycardia                                                                                                                                                                                                                                                       |
| Hypokalemia                       | Any single event $\leq 3.0$ mEq/L during the cooling induction and maintenance                                                                                                                                                                                                                                 |
| Hyperkalemia                      | Any single event $\geq 5.0$ mEq/L during the rewarming                                                                                                                                                                                                                                                         |
| Hyperglycemia                     | Any single event $\geq 180$ mg/dl during the cooling induction and maintenance                                                                                                                                                                                                                                 |
| Hypoglycemia                      | Any single event $\leq 80$ mg/dl during the rewarming                                                                                                                                                                                                                                                          |
| Bleeding                          | Any type of bleeding associated with TH                                                                                                                                                                                                                                                                        |
| Hypotension                       | SBP <90 mmHg or MAP <60mmHg for at least 30 min or the need for supportive measures (fluid loading and vasopressors or inotropic or both) to maintain a SBP> 90 mmHg or MAP>60 mmHg                                                                                                                            |
| Other AEs                         | Adverse events developed within 7 days after ROSC                                                                                                                                                                                                                                                              |
| Sepsis                            | A clinical syndrome defined by the presence of both documented or suspected infection and a systemic inflammatory response syndrome                                                                                                                                                                            |
| Severe sepsis                     | Sepsis with organ dysfunction, hypoperfusion or hypotension                                                                                                                                                                                                                                                    |
| Septic shock                      | Sepsis with hypotension (SBP<90mmHg or reduction of >40mmHg from baseline) or requirement for vasoactive agent                                                                                                                                                                                                 |
| Pneumonia                         | Following 4 clinical criteria are required for diagnosis:<br>1) new or progressive consolidation on the chest radiograph, 2) fever, 3) leukocytosis, 4) presence of purulent tracheobronchial secretions                                                                                                       |
| <b>Outcome variables</b>          |                                                                                                                                                                                                                                                                                                                |
| ICU admission                     | Select yes or no                                                                                                                                                                                                                                                                                               |
| Survival discharge                | Select yes or no                                                                                                                                                                                                                                                                                               |
| CPC at hospital discharge         | Select one CPC score at hospital discharge. The CPC score was abstracted from the medical charts or electronic medical records                                                                                                                                                                                 |
| Cause of death                    | Select the one cause<br>Hypoxic brain injury was defined as the death due to brain damage with no organ dysfunction<br>Multiple organ failure was defined as the death due to dysfunction of two more organs<br>Others include circulatory failure and other cause of arrest (e.g. re-arrest due to sudden VF) |
| Hospital death date               | Record hospital day after admission                                                                                                                                                                                                                                                                            |
