# Supplementary material for: Adverse events associated with poor neurological outcome during targeted temperature management and advanced critical care after out-of-hospital cardiac arrest
Source: PubMed Central journal article supplement (PMC4511983; doi:10.1186/s13054-015-0991-9), 2015-07-22
Supplement: 13054_2015_991_MOESM3_ESM.pdf [file 13054_2015_991_MOESM3_ESM.pdf]

**Additional file 3. Supplementary figures**

Figure 1. Definition of the period in post-cardiac arrest care

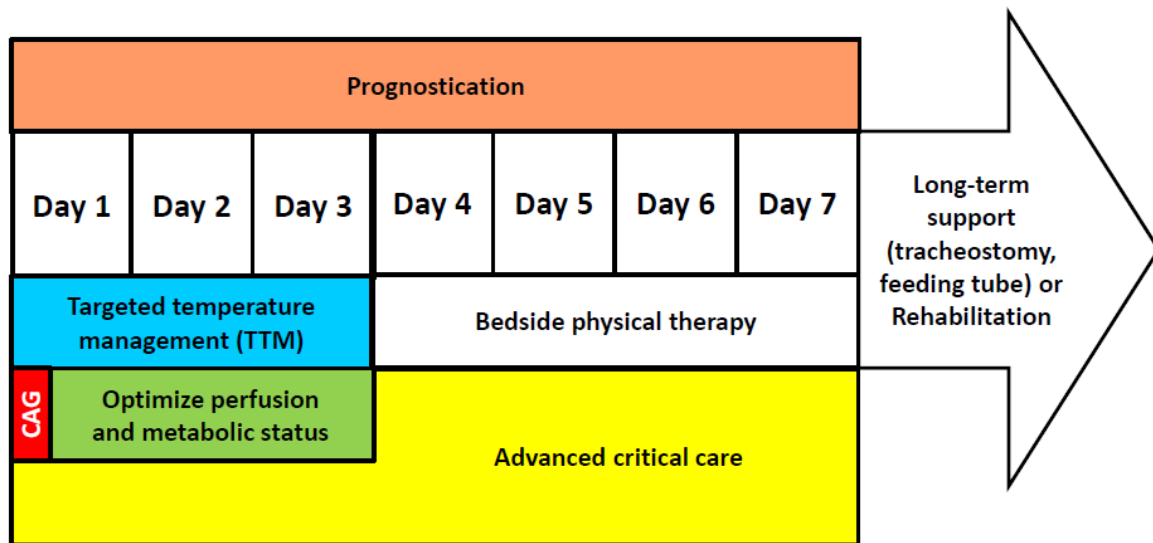

Figure 2. Geographic distribution and the number of patients enrolled in the 24 participating centers

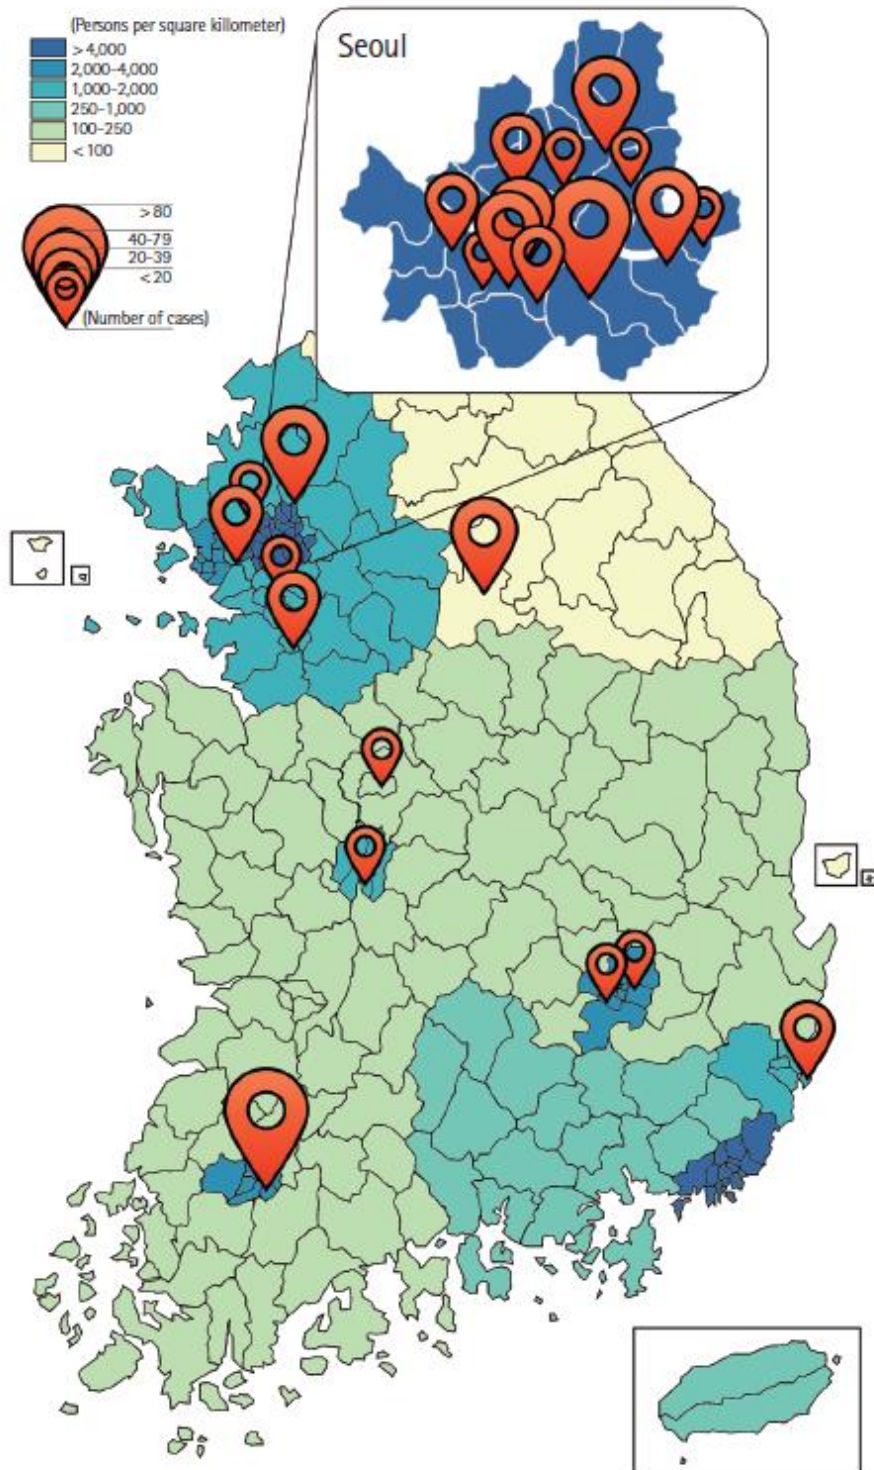

This figure was copied from the reference #21. (Byung Kook Lee, Kyu Nam Park, Gu Hyun Kang, et al. *Clin Exp Emerg Med* 2014, 1:19-27) with permission of the copyright owner (*Clin Exp Emerg Med*, eISSN2383-4625).
