# Supplementary material for: Adverse events associated with poor neurological outcome during targeted temperature management and advanced critical care after out-of-hospital cardiac arrest
Source: PubMed Central journal article supplement (PMC4511983; doi:10.1186/s13054-015-0991-9), 2015-07-22
Supplement: 13054_2015_991_MOESM4_ESM.pdf [file 13054_2015_991_MOESM4_ESM.pdf]

**Additional file 4. Results of the sensitivity analysis for the patients who survived after sedation is withdrawn**

Table 1. Baseline patient characteristics

| Patient characteristics                    | Good neurological outcome<br>(CPC 1 and 2)<br>n=228 (33.9) | Poor neurological outcome<br>(CPC 3-5)<br>n=444 (66.1) | <i>p</i> |
|--------------------------------------------|------------------------------------------------------------|--------------------------------------------------------|----------|
| <b>Background variables</b>                |                                                            |                                                        |          |
| Age, years                                 | 50 (40 - 60)                                               | 59 (47 - 71)                                           | <.001    |
| Male                                       | 177 (77.6)                                                 | 303 (68.2)                                             | 0.011    |
| Previously healthy <sup>a</sup>            | 130 (57.0)                                                 | 167 (37.6)                                             | <.001    |
| Myocardial infarction                      | 13 (5.7)                                                   | 22 (5.2)                                               | 0.776    |
| Angina                                     | 19 (8.3)                                                   | 29 (6.5)                                               | 0.391    |
| Congestive heart failure                   | 5 (2.2)                                                    | 17 (3.8)                                               | 0.259    |
| Hypertension                               | 57 (25.0)                                                  | 168 (37.8)                                             | 0.001    |
| Diabetes mellitus                          | 29 (12.7)                                                  | 107 (24.1)                                             | 0.001    |
| Pulmonary disease                          | 4 (1.8)                                                    | 32 (7.2)                                               | 0.003    |
| Stroke                                     | 4 (1.8)                                                    | 25 (5.6)                                               | 0.019    |
| Other neurological disease                 | 7 (3.1)                                                    | 32 (7.2)                                               | 0.030    |
| Renal disease                              | 4 (1.8)                                                    | 36 (8.1)                                               | 0.001    |
| Liver cirrhosis                            | 1 (0.4)                                                    | 7 (1.6)                                                | 0.277    |
| Malignancy                                 | 5 (2.2)                                                    | 13 (2.9)                                               | 0.576    |
| <b>Resuscitation variables</b>             |                                                            |                                                        |          |
| Witnessed arrest                           | 182 (79.8)                                                 | 273 (61.5)                                             | <.001    |
| Bystander CPR                              | 85 (37.3)                                                  | 111 (25.0)                                             | 0.001    |
| First monitored rhythm                     |                                                            |                                                        | <.001    |
| VF/ pulseless VT                           | 148 (64.9)                                                 | 84 (18.9)                                              |          |
| Pulseless electrical activity              | 28 (12.3)                                                  | 75 (16.9)                                              |          |
| Asystole                                   | 41 (17.9)                                                  | 274 (61.7)                                             |          |
| Unknown                                    | 11 (4.8)                                                   | 11 (2.5)                                               |          |
| Cardiac cause of arrest                    | 201 (88.2)                                                 | 214 (48.2)                                             | <.001    |
| Time from arrest to ROSC, min              | 24.5 (16.5 - 34.5)                                         | 33 (25 - 45)                                           | <.001    |
| <b>Post-resuscitation variables</b>        |                                                            |                                                        |          |
| Initial Glasgow coma scale $\geq$ 5        | 76 (33.3)                                                  | 21 (4.7)                                               | <.001    |
| Initial presence of pupillary light reflex | 178 (78.1)                                                 | 127 (28.6)                                             | <.001    |
| ST elevation myocardial infarction         | 36 (15.8)                                                  | 22 (5.0)                                               | <.001    |
| Cardiogenic shock <sup>b</sup>             | 64 (28.1)                                                  | 115 (25.9)                                             | 0.547    |
| Thrombolysis                               | 2 (0.9)                                                    | 3 (0.7)                                                | 1.000    |
| Coronary angiography                       | 152 (66.7)                                                 | 47 (10.6)                                              | <.001    |
| Percutaneous coronary intervention         | 44 (19.3)                                                  | 22 (5.0)                                               | <.001    |
| Coronary artery bypass graft               | 7 (3.1)                                                    | 0 (0.0)                                                | <.001    |

|                                                |                    |                     |       |
|------------------------------------------------|--------------------|---------------------|-------|
| Intra-aortic balloon pump                      | 8 (3.5)            | 8 (1.8)             | 0.169 |
| Extracorporeal membrane oxygenation            | 4 (1.8)            | 10 (2.3)            | 0.782 |
| Continuous renal replacement therapy           | 4 (1.8)            | 45 (10.1)           | <.001 |
| Time from arrest to initiation of cooling, min | 142 (81.5 - 247.5) | 139.5 (78 - 232)    | 0.955 |
| Time from arrest to 34°C, min                  | 385 (257.5 - 570)  | 303.5 (196 - 454.5) | 0.033 |
| Rewarming time, min                            | 666 (420 - 780)    | 720 (480 - 990.5)   | 0.001 |

CPC, cerebral performance category; CPR, cardiopulmonary resuscitation; VF, ventricular fibrillation; VT, ventricular tachycardia; ROSC, return of spontaneous circulation.

Data are presented as medians (interquartile range) or counts (percentage). <sup>a</sup>absence of the listed diseases, <sup>b</sup>hypotension (SBP <90 mmHg or MAP <60mmHg for at least 30 min or the need for supportive measures (fluid loading and vasopressors or inotropic or both) to maintain a SBP > 90 mmHg or MAP >60 mmHg) and end-organ hypoperfusion (cool extremities).

Table 2. Multivariable predictive model for poor neurological outcomes at the time of hospital discharge

| Variables                                               | OR   | (95% CI)     | <i>p</i> |
|---------------------------------------------------------|------|--------------|----------|
| Continuous renal replacement therapy <sup>a</sup>       | 6.02 | (1.93-23.67) | 0.004    |
| Non-shockable initial rhythm <sup>b</sup>               | 3.20 | (1.83-5.65)  | <.001    |
| Non-cardiac cause of arrest <sup>c</sup>                | 2.75 | (1.47-5.27)  | 0.002    |
| Previously unhealthy <sup>d</sup>                       | 1.99 | (1.14-3.50)  | 0.016    |
| Time from arrest to ROSC <sup>e</sup>                   | 1.06 | (1.04-1.08)  | <.001    |
| Age <sup>f</sup>                                        | 1.03 | (1.02-1.05)  | <.001    |
| Initial Glasgow Coma Scale ≥ 5 <sup>g</sup>             | 0.30 | (0.14-0.63)  | 0.002    |
| Initial presence of pupillary light reflex <sup>h</sup> | 0.28 | (0.17-0.46)  | <.001    |
| Coronary angiography <sup>i</sup>                       | 0.12 | (0.07-0.21)  | <.001    |

ROSC, return of spontaneous circulation; OR, odds ratio; 95% CI, 95% confidence interval

<sup>a</sup>no continuous renal replacement therapy as reference, <sup>b</sup>VF/pulseless VT as reference, <sup>c</sup>cardiac cause of arrest as reference, <sup>d</sup>absence of the listed diseases as reference, <sup>e</sup>by minute, <sup>f</sup>by year, <sup>g</sup><5 as reference, <sup>h</sup>absence of pupillary light reflex as reference, <sup>i</sup>no coronary angiography as reference

| Hosmer and Lemeshow Goodness-of-fit test |            |
|------------------------------------------|------------|
| Chi-square (DF)                          | 7.4731 (8) |
| <i>P</i> value                           | 0.4865     |
| R square                                 | 0.4827     |
| Max-rescaled R-square                    | 0.6683     |

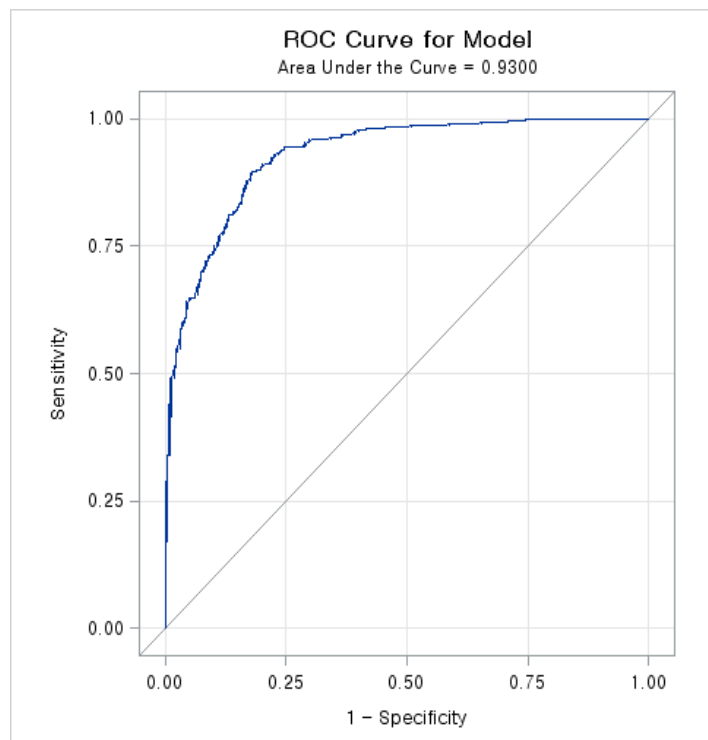

Table 3. Adverse events and concomitant treatments with corresponding odds ratios for poor neurological outcomes at the time of hospital discharge

| Category                                         | AEs and concomitant treatments    | Total<br>N (%) | CPC 1 and 2<br>n (%) | CPC 3-5<br>n (%) | OR (95% CI)      | <i>p</i> | Adjusted OR (95% CI) | <i>p</i> |
|--------------------------------------------------|-----------------------------------|----------------|----------------------|------------------|------------------|----------|----------------------|----------|
|                                                  |                                   | 672 (100)      | 228(32.4)            | 444 (67.6)       |                  |          |                      |          |
| Cooling<br>-related AEs                          | Overcooling <sup>a</sup>          | 121 (18.0)     | 23 (10.1)            | 98 (22.1)        | 2.52 (1.55-4.10) | <.001    | 1.14 (0.56-2.31)     | 0.718    |
|                                                  | Bradycardia <sup>b</sup>          | 79 (11.8)      | 35 (15.4)            | 44 (9.9)         | 0.61 (0.38-0.98) | 0.040    | 0.73 (0.35-1.54)     | 0.408    |
|                                                  | Tachyarrhythmia                   | 60 (8.9)       | 24 (10.5)            | 36 (8.1)         | 0.75 (0.44-1.29) | 0.299    | 0.54 (0.25-1.18)     | 0.124    |
|                                                  | Hypokalemia <sup>c</sup>          | 208 (31.0)     | 65 (28.5)            | 143 (32.2)       | 1.19 (0.84-1.69) | 0.326    | 1.16 (0.68-1.97)     | 0.599    |
|                                                  | Hyperglycemia <sup>d</sup>        | 304 (45.2)     | 81 (35.5)            | 223 (50.2)       | 1.83 (1.32-2.54) | <.001    | 1.40 (0.85-2.30)     | 0.191    |
|                                                  | Bleeding                          | 20 (3.0)       | 6 (2.6)              | 14 (3.2)         | 1.21 (0.46-3.18) | 0.707    | 0.93 (0.21-4.08)     | 0.920    |
| Rewarming<br>-related AEs                        | Hypotension <sup>e</sup>          | 190 (28.3)     | 54 (23.7)            | 136 (30.6)       | 1.42 (0.99-2.05) | 0.059    | 1.01 (0.58-1.79)     | 0.961    |
|                                                  | Rebound hyperthermia <sup>f</sup> | 83 (12.4)      | 29 (12.7)            | 54 (12.2)        | 0.95 (0.59-1.54) | 0.834    | 1.46 (0.66-3.23)     | 0.355    |
|                                                  | Arrhythmia                        | 39 (5.8)       | 10 (4.4)             | 29 (6.5)         | 1.52 (0.73-3.18) | 0.263    | 1.42 (0.52-3.92)     | 0.496    |
|                                                  | Hyperkalemia <sup>g</sup>         | 45 (6.7)       | 7 (3.1)              | 38 (8.6)         | 2.96 (1.30-6.73) | 0.010    | 1.12 (0.37-3.33)     | 0.845    |
|                                                  | Hypoglycemia <sup>h</sup>         | 68 (10.1)      | 22 (9.7)             | 46 (10.4)        | 1.08 (0.63-1.85) | 0.772    | 1.19 (0.52-2.73)     | 0.686    |
|                                                  | Bleeding                          | 12 (1.8)       | 3 (1.3)              | 9 (2.0)          | 1.55 (0.42-6.79) | 0.513    | 1.02 (0.16-6.44)     | 0.981    |
| Other AEs<br>during<br>advanced<br>critical care | Hypotension <sup>e</sup>          | 138 (20.5)     | 36 (15.8)            | 102 (23.0)       | 1.59 (1.05-2.42) | 0.030    | 1.00 (0.54-1.87)     | 0.997    |
|                                                  | Pneumonia <sup>i</sup>            | 271 (40.3)     | 70 (30.7)            | 201 (45.3)       | 1.87 (1.33-2.62) | <.001    | 1.00 (0.60-1.67)     | 0.995    |
|                                                  | Sepsis                            | 95 (14.1)      | 17 (7.5)             | 78 (17.6)        | 2.65 (1.52-4.59) | 0.001    | 3.16 (1.38-7.22)     | 0.007    |
|                                                  | Myoclonus <sup>j</sup>            | 150 (22.3)     | 34 (14.9)            | 116 (26.1)       | 2.02 (1.32-3.08) | 0.001    | 3.71 (1.92-7.19)     | <.001    |
|                                                  | Seizure <sup>k</sup>              | 153 (22.8)     | 24 (10.5)            | 129 (29.1)       | 3.48 (2.18-5.57) | <.001    | 4.56 (2.29-9.10)     | <.001    |
| Concomitant<br>treatments                        | Hypoglycemia <sup>l</sup>         | 156 (23.2)     | 36 (15.8)            | 120 (27.0)       | 1.98 (1.31-2.09) | 0.001    | 2.13 (1.14-4.00)     | 0.019    |
|                                                  | Anticonvulsants                   | 281 (41.8)     | 71 (31.1)            | 210 (47.3)       | 1.98 (1.42-2.78) | <.001    | 1.75 (1.06-1.68)     | 0.030    |
|                                                  | Insulin                           | 436 (64.9)     | 136(59.7)            | 300 (67.6)       | 1.41 (1.01-1.96) | 0.042    | 1.01 (0.61-1.68)     | 0.967    |
|                                                  | Analgesics                        | 314 (46.7)     | 122 (53.5)           | 192 (43.2)       | 0.66 (0.48-0.91) | 0.012    | 0.77 (0.47-1.26)     | 0.298    |
|                                                  | Sedatives                         | 634 (94.4)     | 222 (97.4)           | 412 (92.8)       | 0.35 (0.14-0.85) | 0.020    | 1.14 (0.33-3.97)     | 0.832    |
|                                                  | Neuromuscular blockers            | 459 (68.3)     | 174 (76.3)           | 285 (64.2)       | 0.56 (0.39-0.80) | 0.002    | 0.51 (0.29-0.89)     | 0.018    |

AEs, adverse events; CPC, cerebral performance category. <sup>a</sup><32 °C; <sup>b</sup>heart rate<40 bpm; <sup>c</sup>≤3.0 mEq/L; <sup>d</sup>≥180 mg/dL; <sup>e</sup> SBP<90 mmHg or MAP<60mmHg for at least 30 min or the need for supportive measures (fluid loading and vasopressors or inotropic or both) to maintain a SBP> 90 mmHg or MAP>60 mmHg; <sup>f</sup>>38 °C within 24 hours of the cessation of cooling; <sup>g</sup>≥5.0 mEq/L; <sup>h</sup>≤80 mg/dL within 72 h after ROSC; <sup>i</sup>new or progressive consolidation on the chest radiograph, fever, leukocytosis, and the presence of purulent tracheobronchial secretions; <sup>j</sup>clinically involuntary movement without epileptiform discharge on EEG; <sup>k</sup>either clinically involuntary movement with epileptiform discharge on electroencephalogram (EEG) or epileptiform discharge only on EEG; <sup>l</sup>≤80 mg/dL within 72 hours after ROSC
